# Supplementary material
Source: PubMed Central journal article supplement (PMC1567910)

**Placebo**

**Paraquat**

**DJ-1b  
C104D**

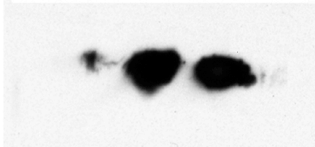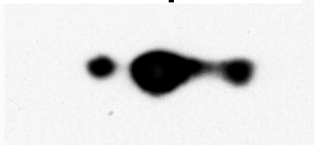

**DJ-1b  
C45D**

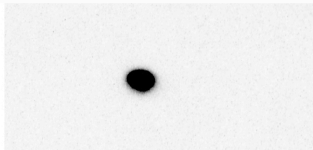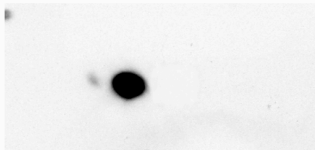

Supplement: pnas_0601891103_2.pdf [file pnas_0601891103_2.pdf]

**DJ-1b C45A**

— | — |  
- +

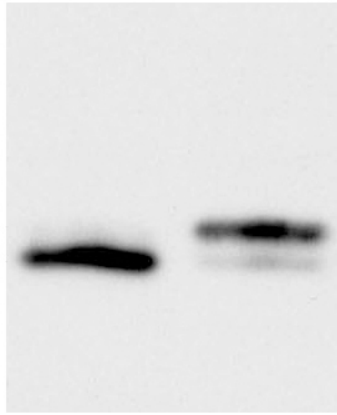

**DJ-1b C45D**

— | — |  
- +

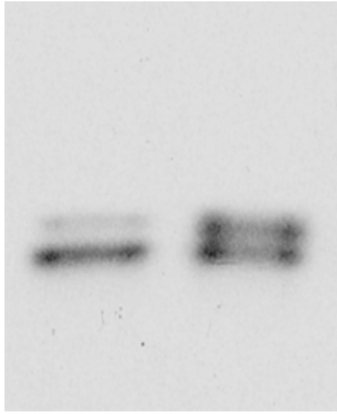

**DJ-1b C45A +  
C104A**

— | — |  
- +

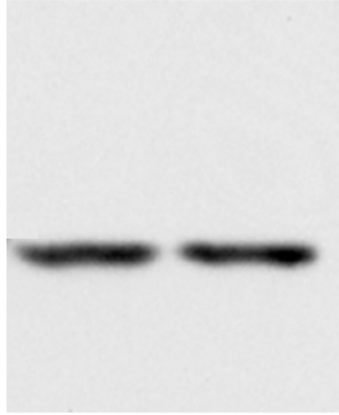

Supplement: pnas_0601891103_3.pdf [file pnas_0601891103_3.pdf]

**A**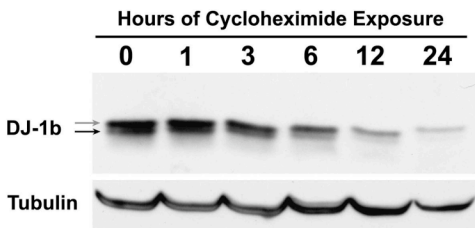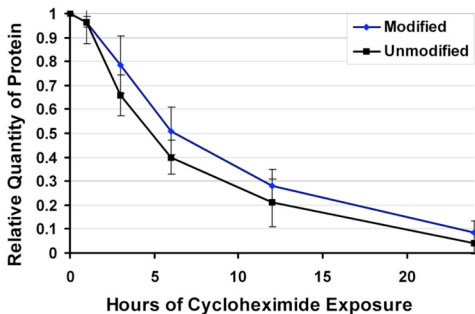**B**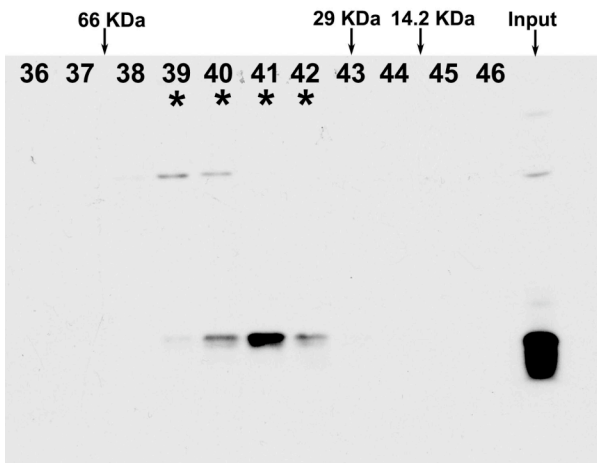

Supplement: pnas_0601891103_4.pdf [file pnas_0601891103_4.pdf]

**W17178**

**SODx16/+**

**SODx39/+**

**SODx16/x39**

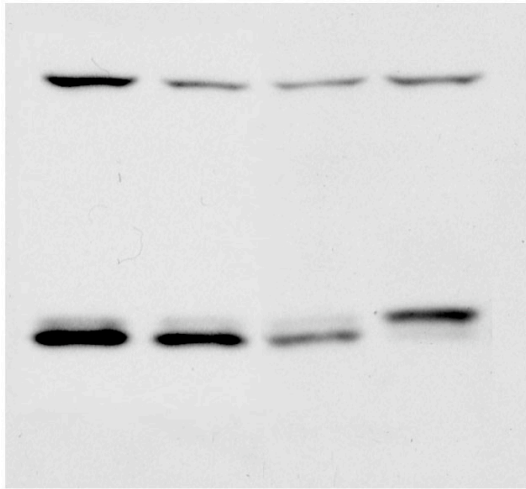

Supplement: pnas_0601891103_5.pdf [file pnas_0601891103_5.pdf]

# Skin

4mo

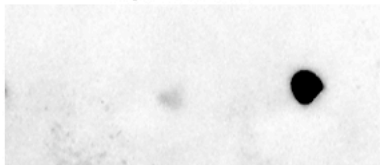

12mo

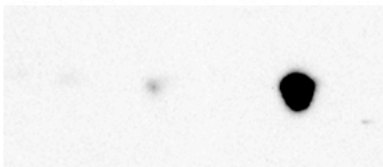

18mo

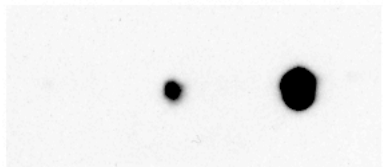

24mo

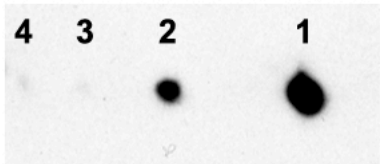

Supplement: pnas_0601891103_6.pdf [file pnas_0601891103_6.pdf]
